# Supplementary material
Source: PubMed Central journal article supplement (PMC8722442)

**Figure S1 (Related to Figure 1)- *In toto* imaging of the developing zebrafish inner ear reveals multi-scale dynamics during semicircular canal morphogenesis**

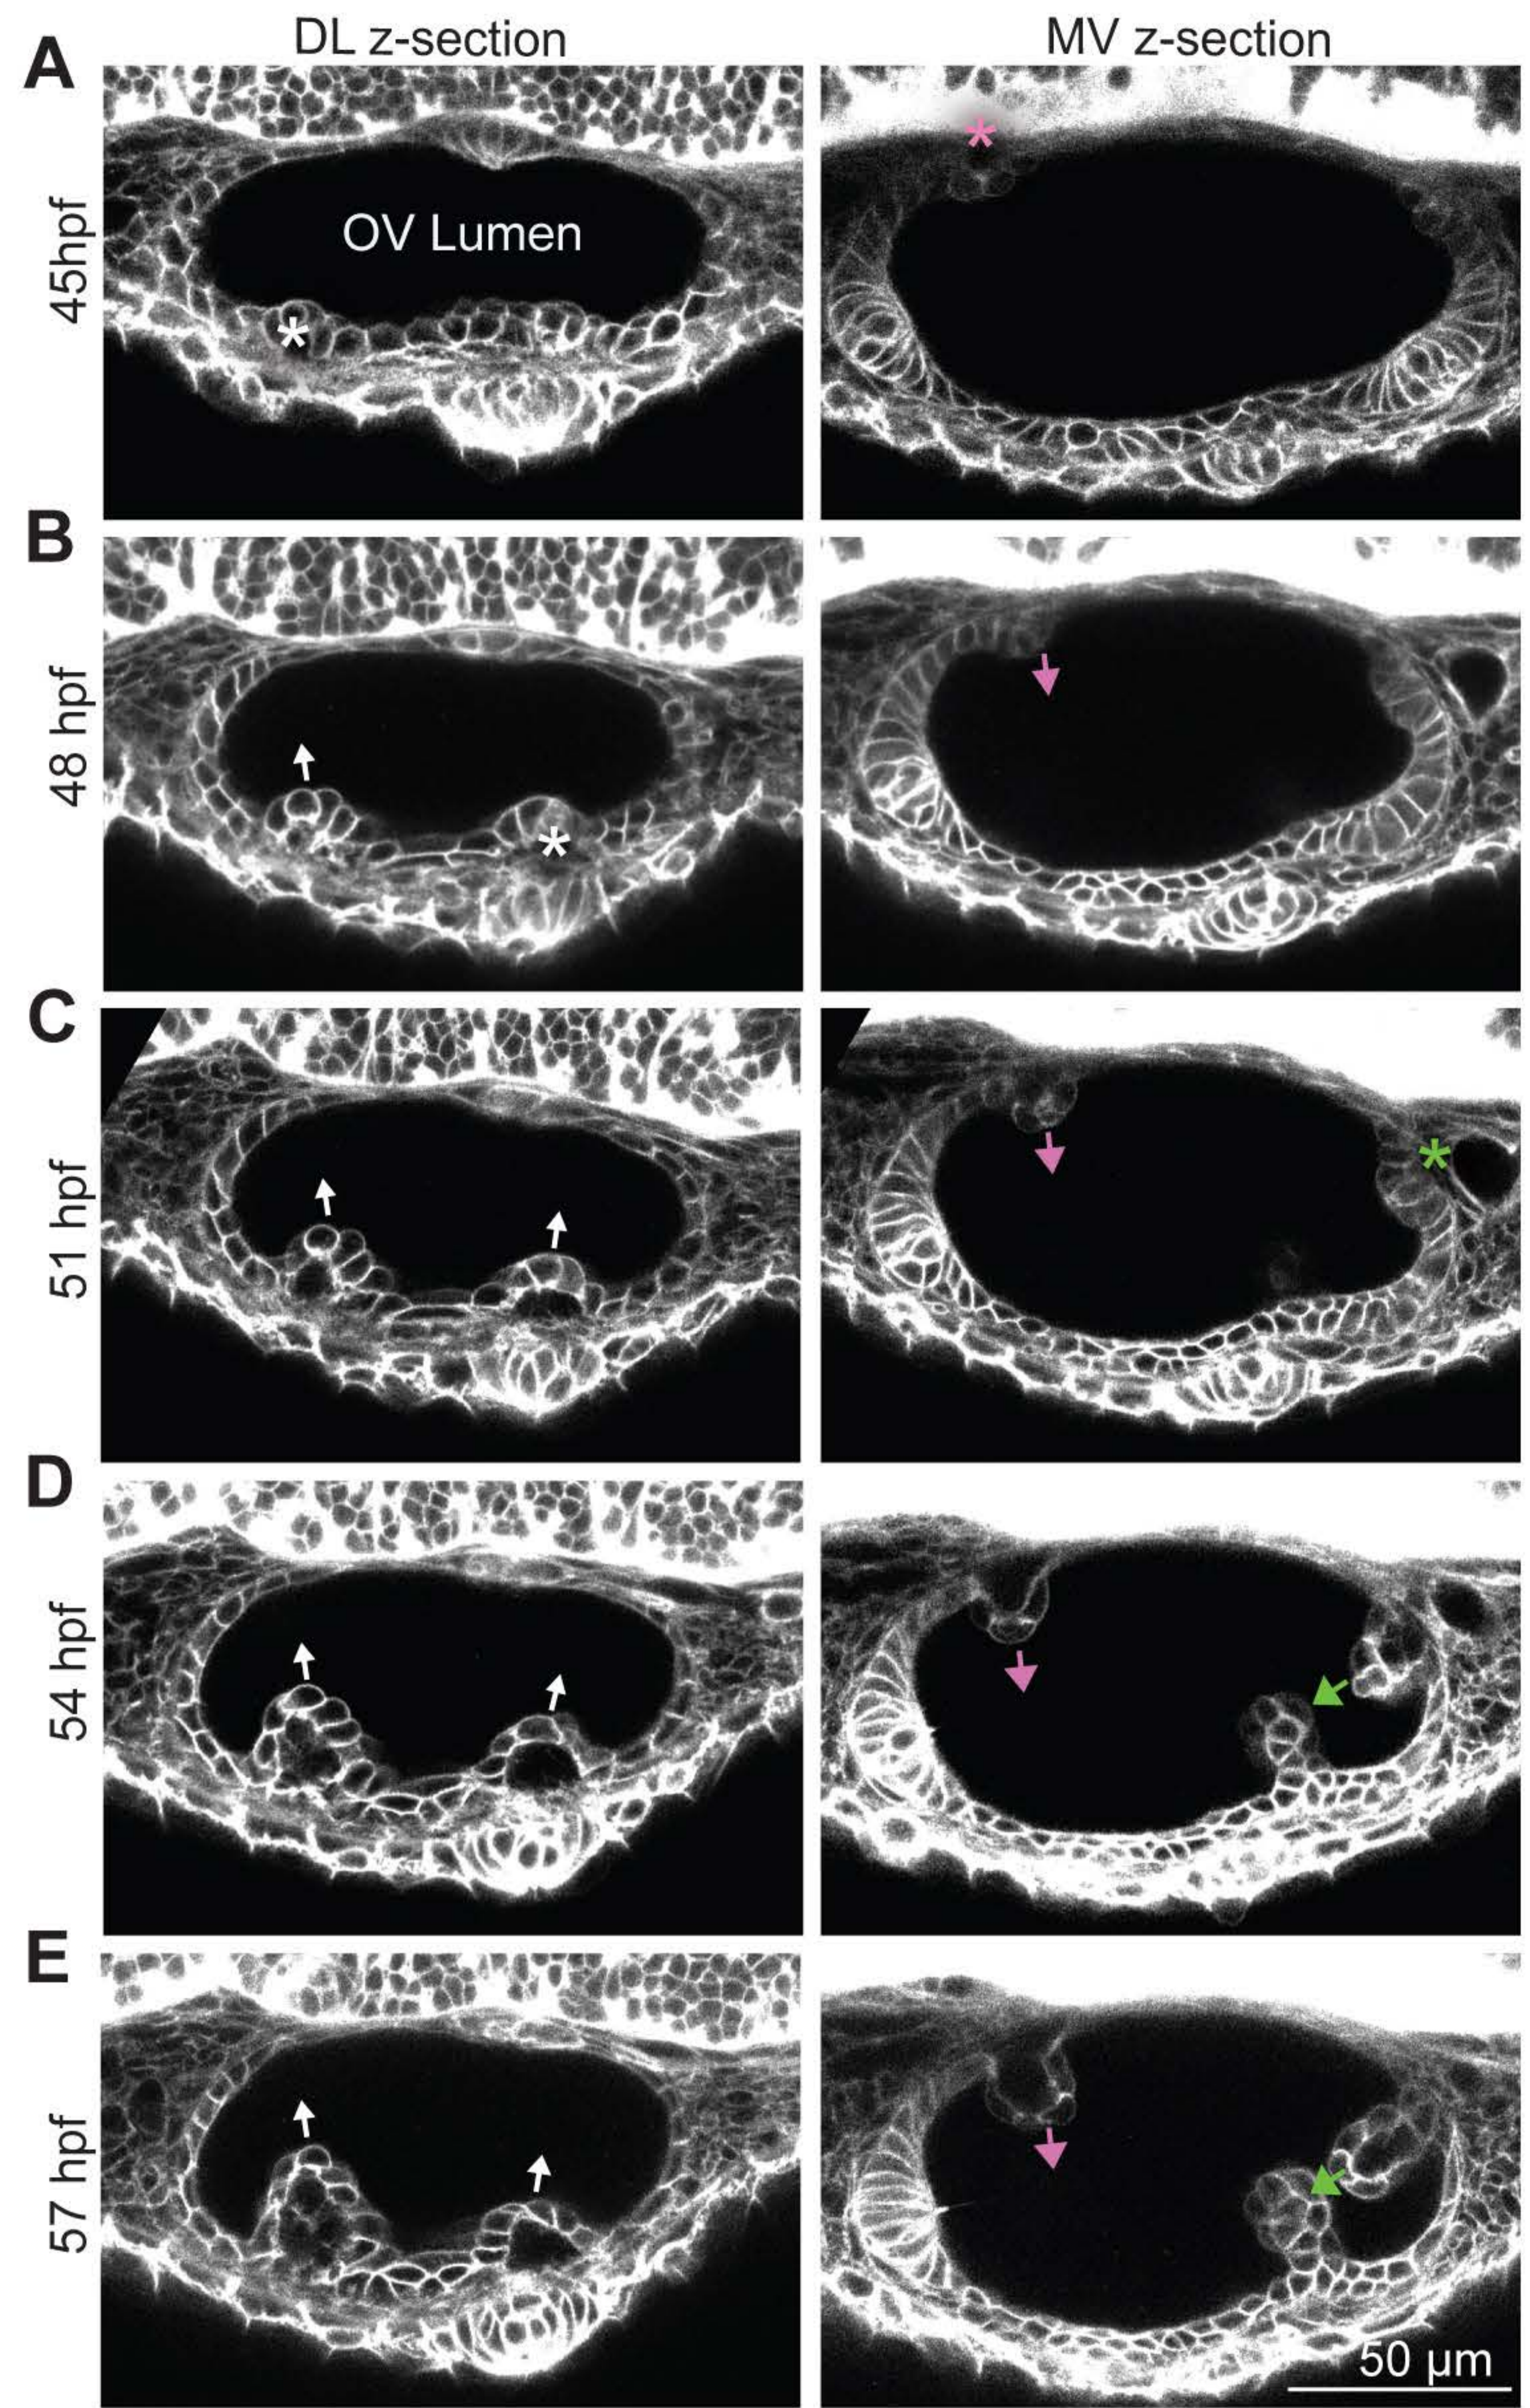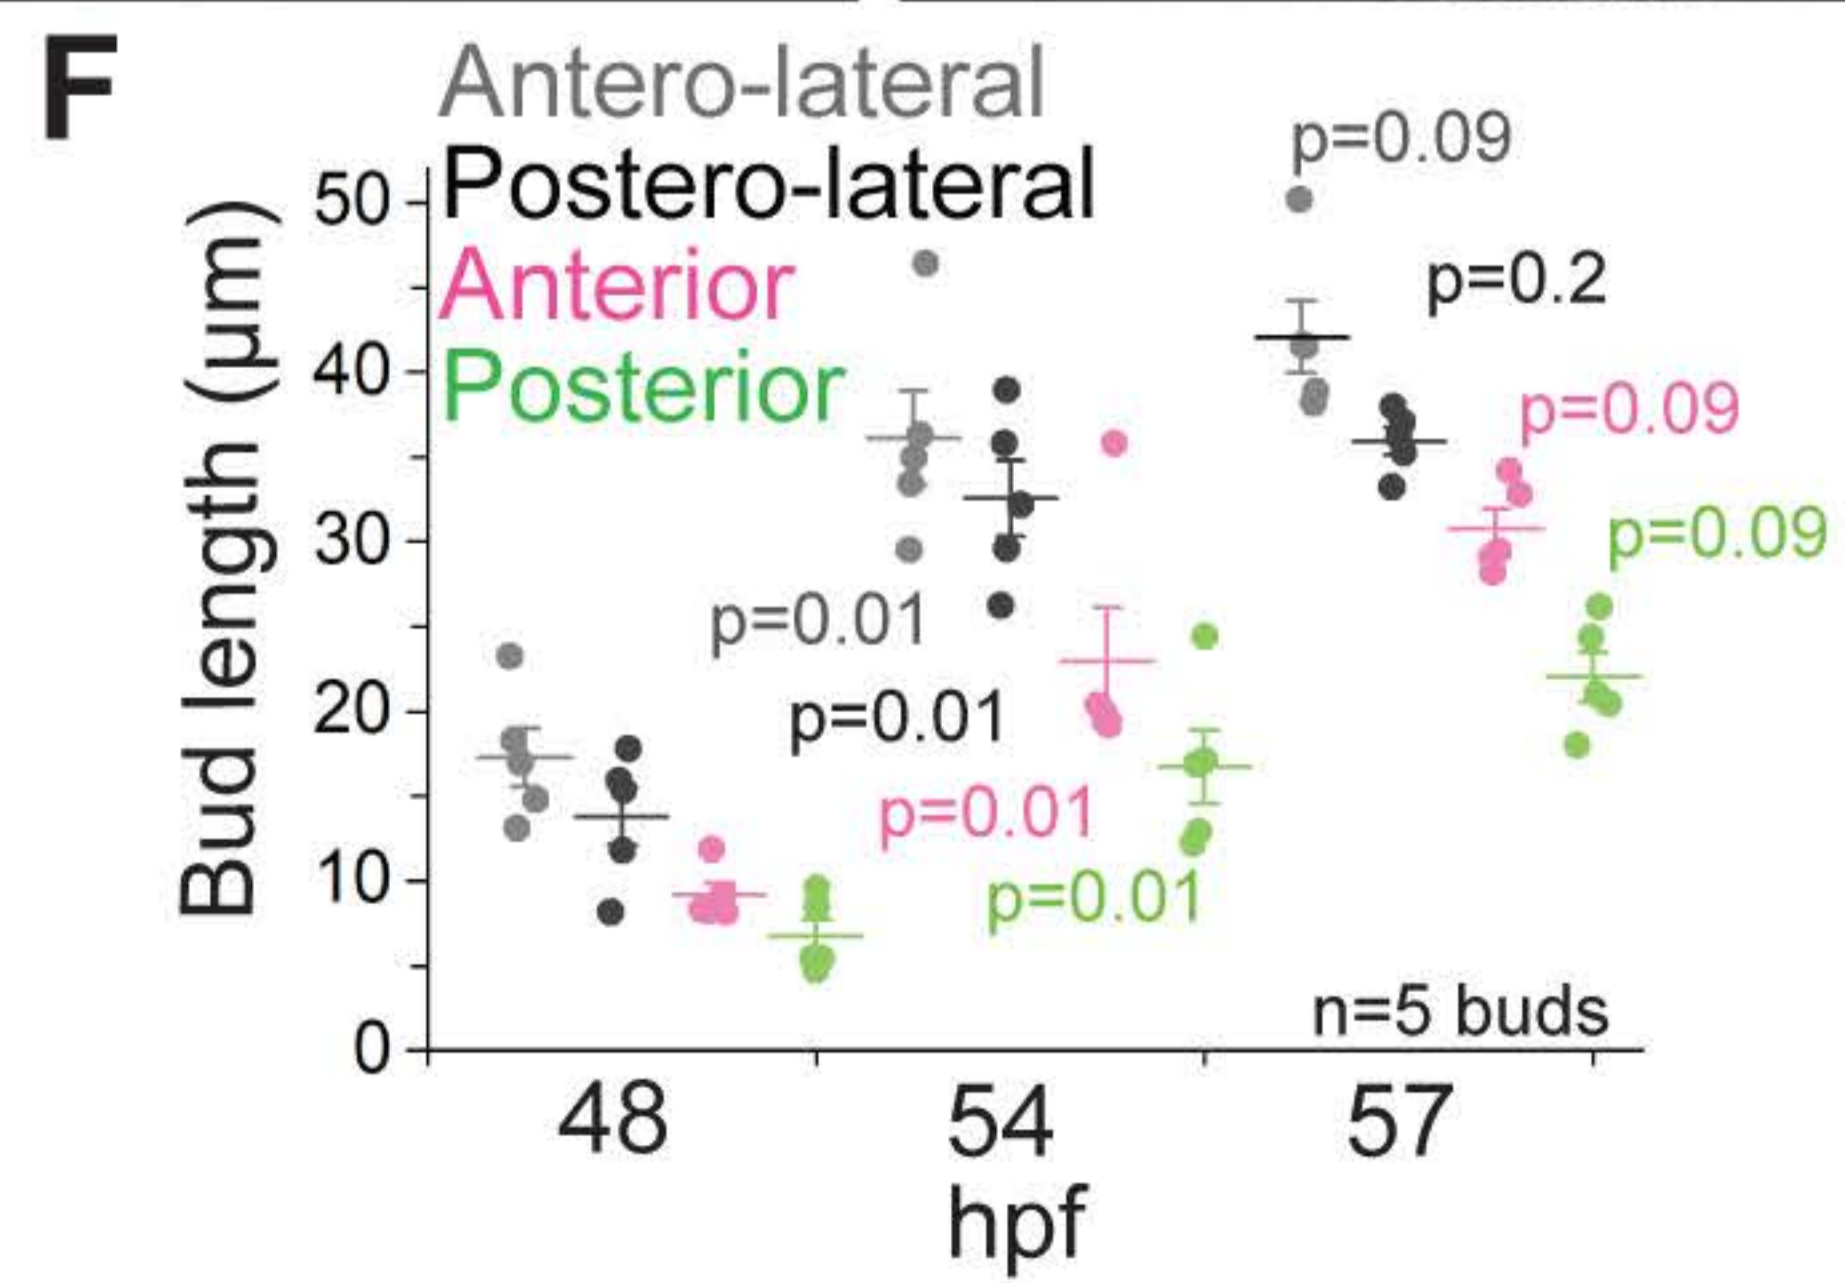

Supplement: NIHMS1759581-supplement-SF1.pdf [file NIHMS1759581-supplement-SF1.pdf]
