# Supplementary material
Source: PubMed Central journal article supplement (PMC8722442)

**Figure S2 (Related to Figure 3)- Hyaluronan synthesis is required for semicircular canal morphogenesis and patterned through synthesis enzymes *ugdh* and *has3***

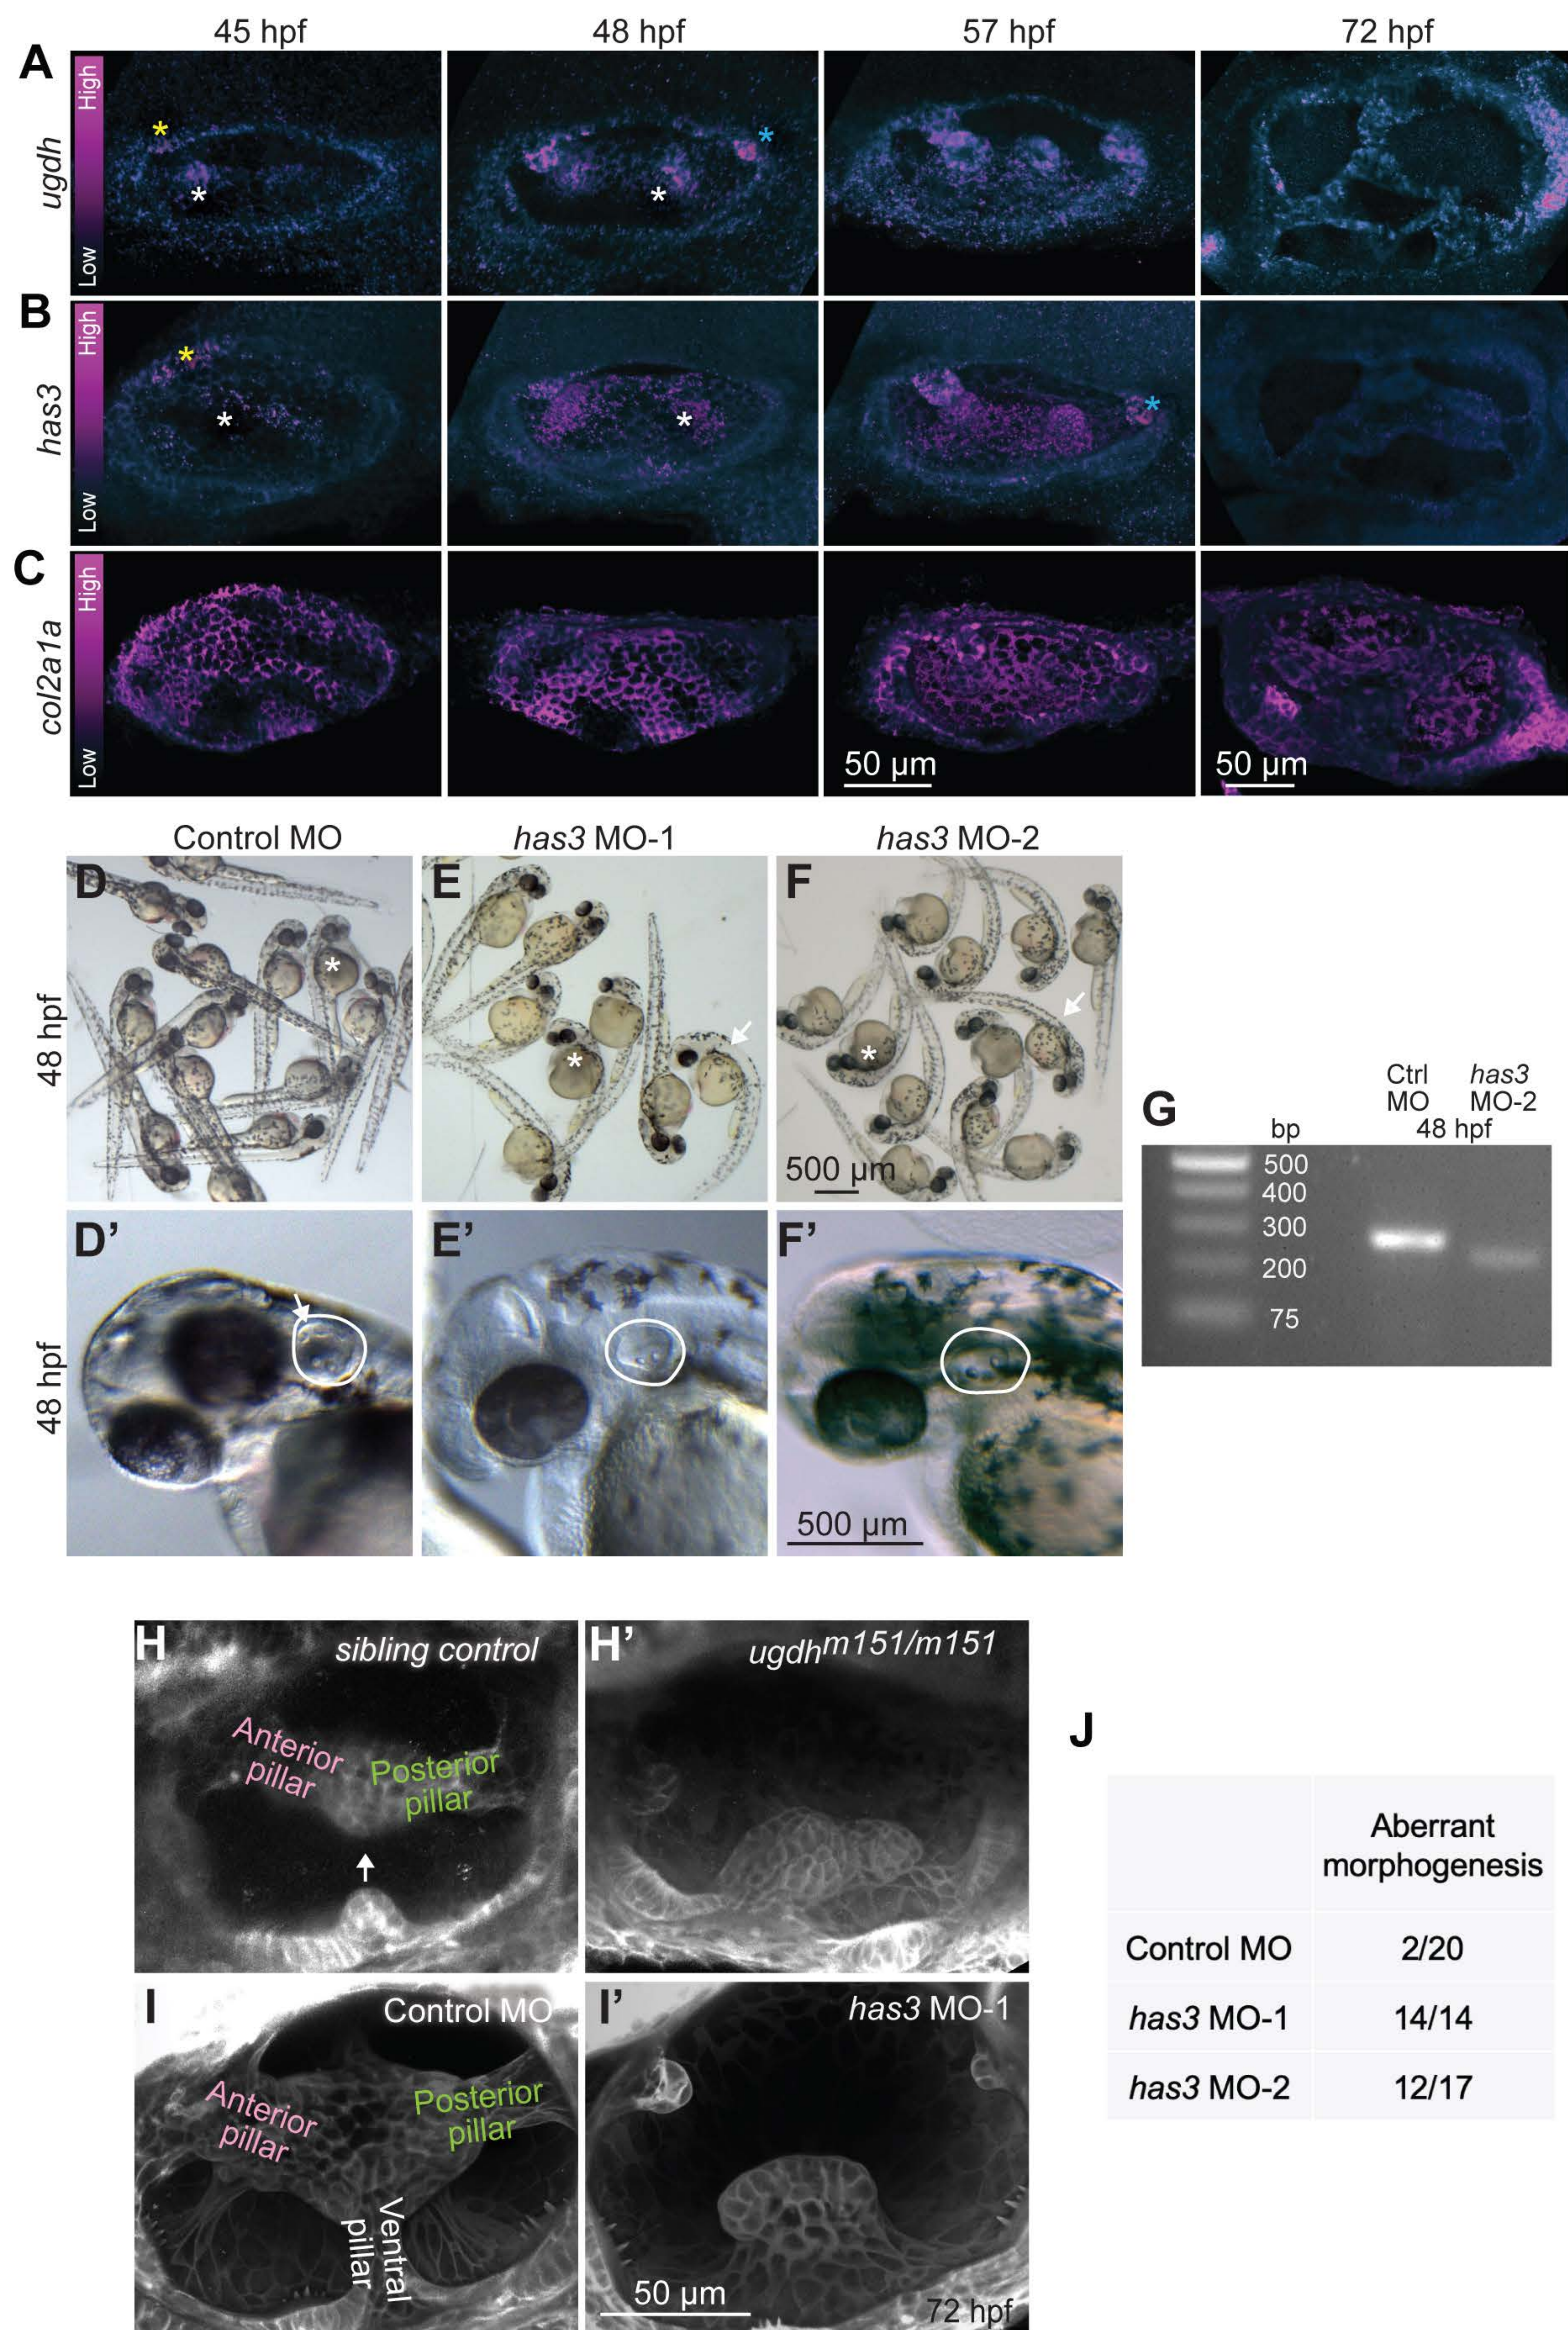

Supplement: NIHMS1759581-supplement-SF2.pdf [file NIHMS1759581-supplement-SF2.pdf]
