# Supplementary material
Source: PubMed Central journal article supplement (PMC8722442)

**Figure S4 (Related to Figure 6)- Actomyosin networks accumulate on the baso-lateral surface and in tethered membrane protrusions during bud-to-tube transition**

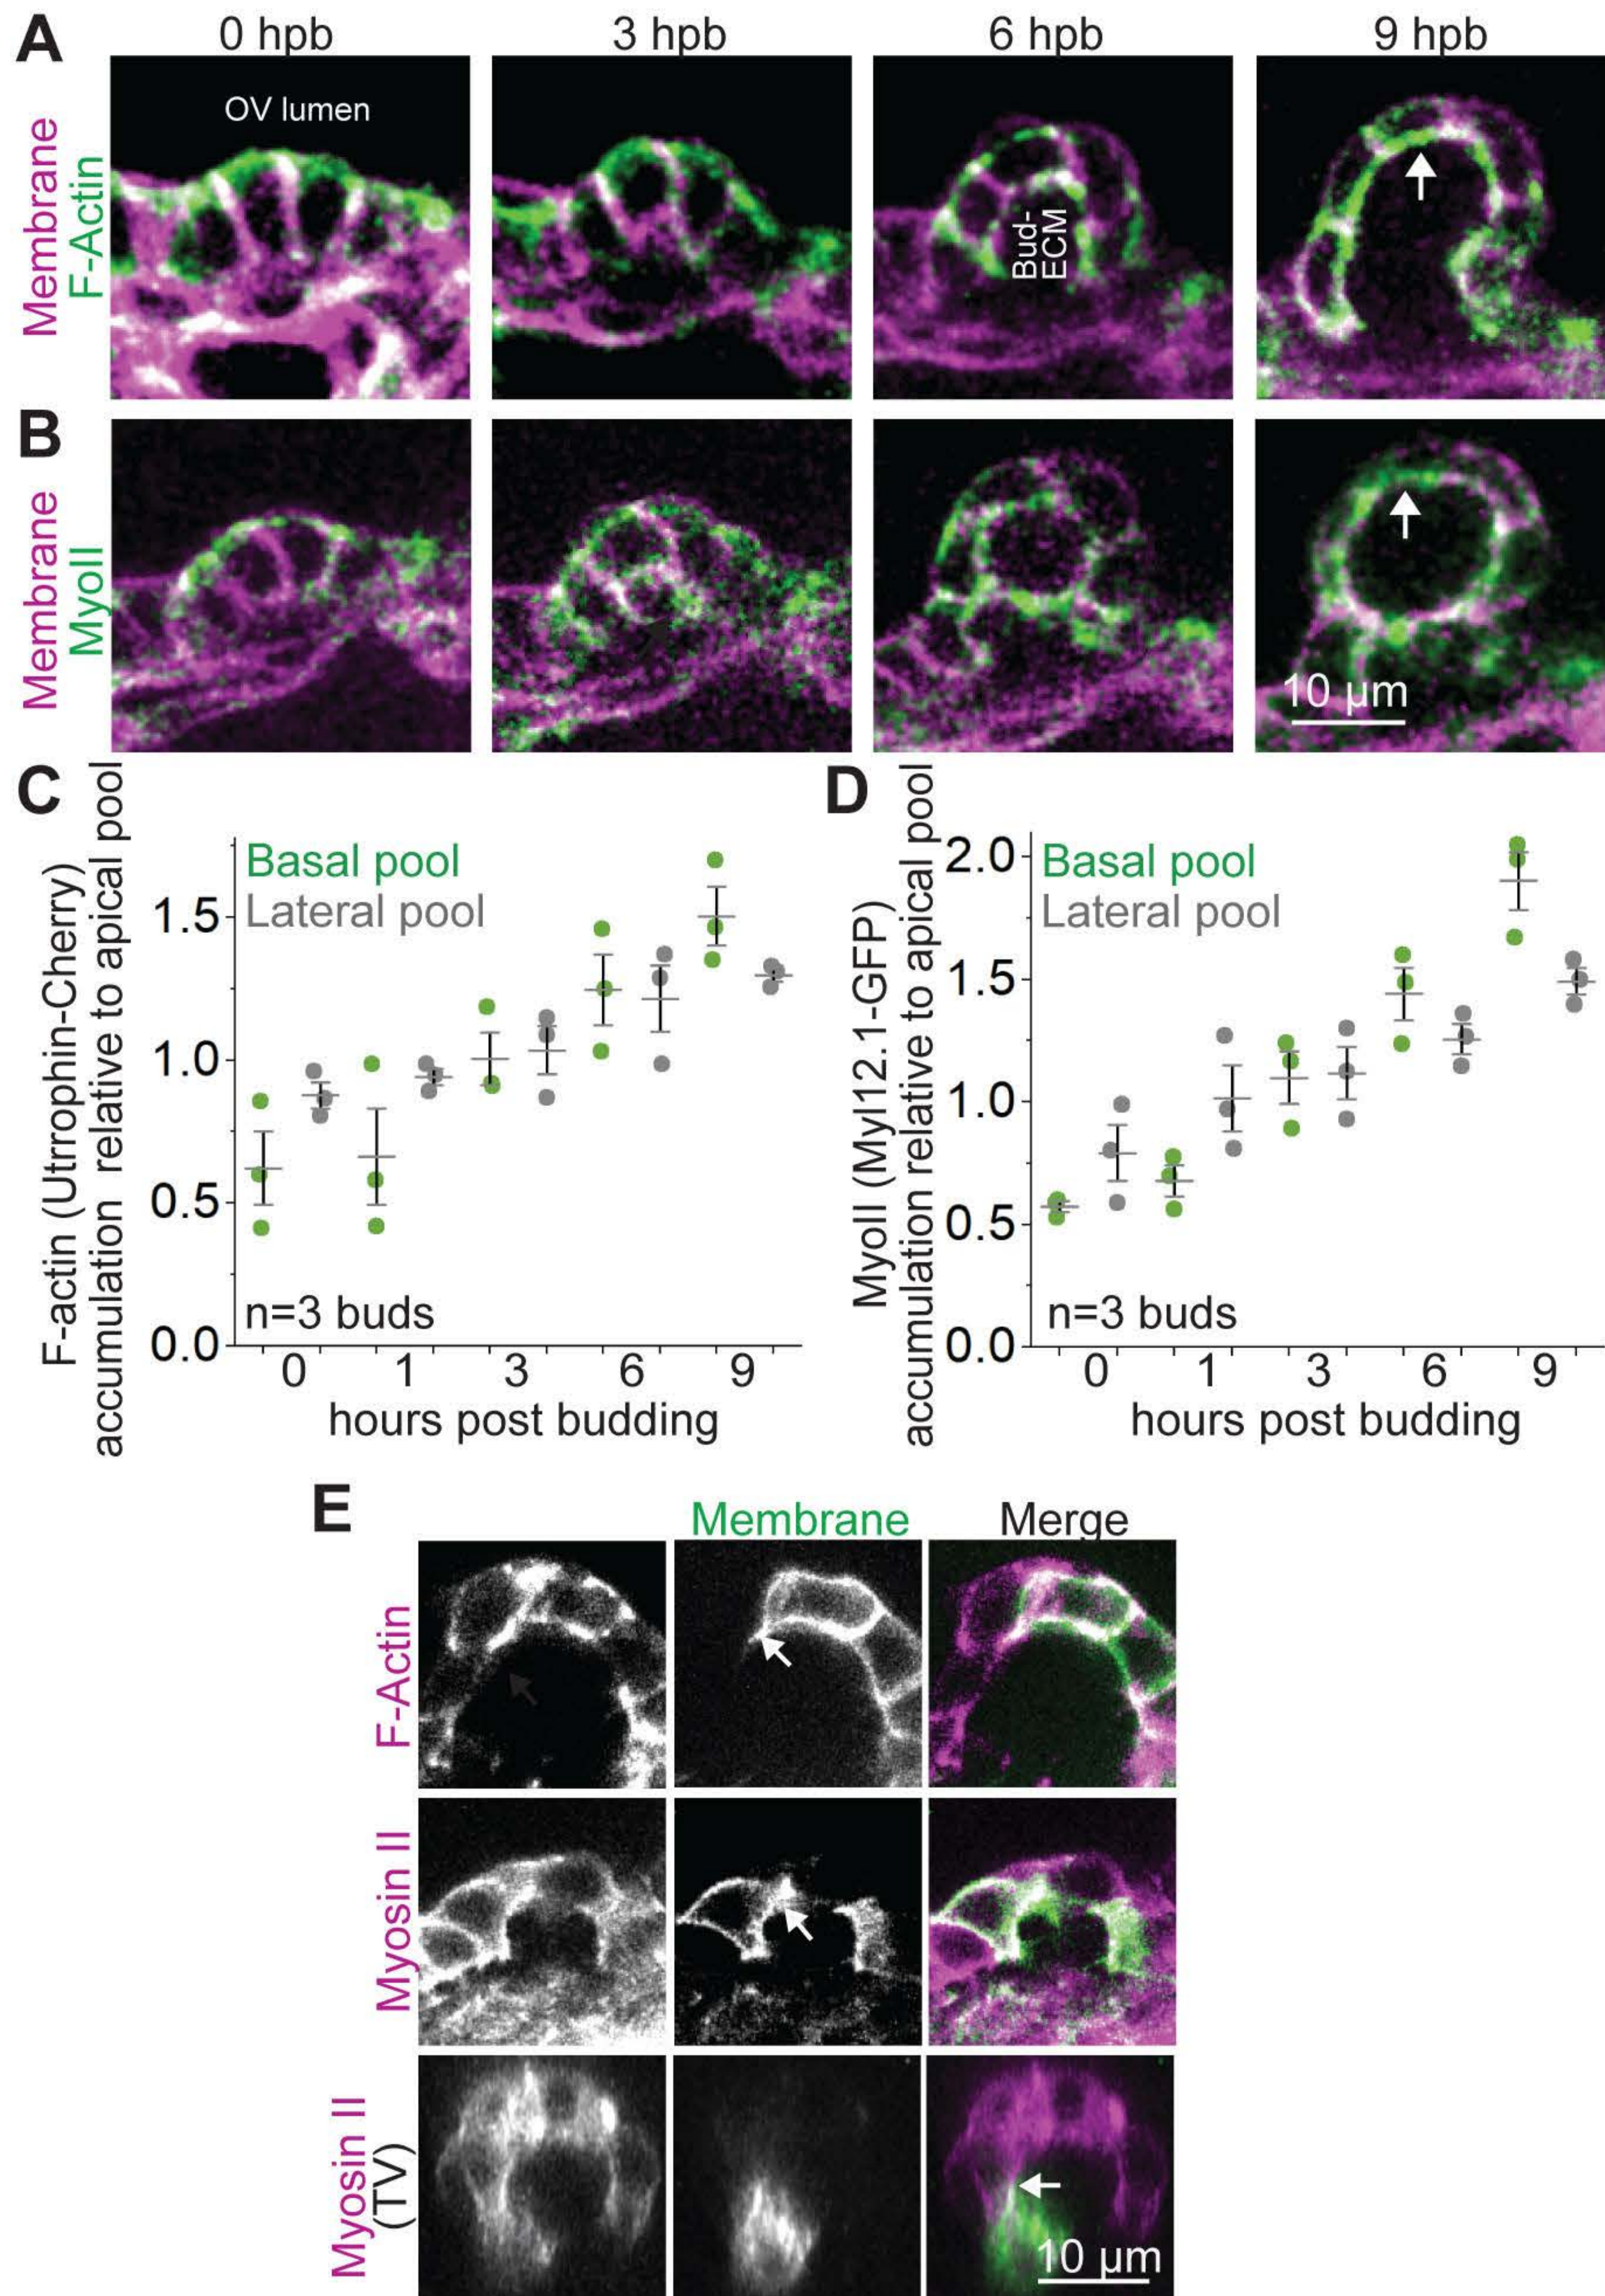

Supplement: NIHMS1759581-supplement-SF4.pdf [file NIHMS1759581-supplement-SF4.pdf]
