# Supplementary material
Source: PubMed Central journal article supplement (PMC8722442)

## Figure S6 (Related to Figure 7)- Anisotropic stiffness from cytoconches is required for bud-to-tube morphogenesis

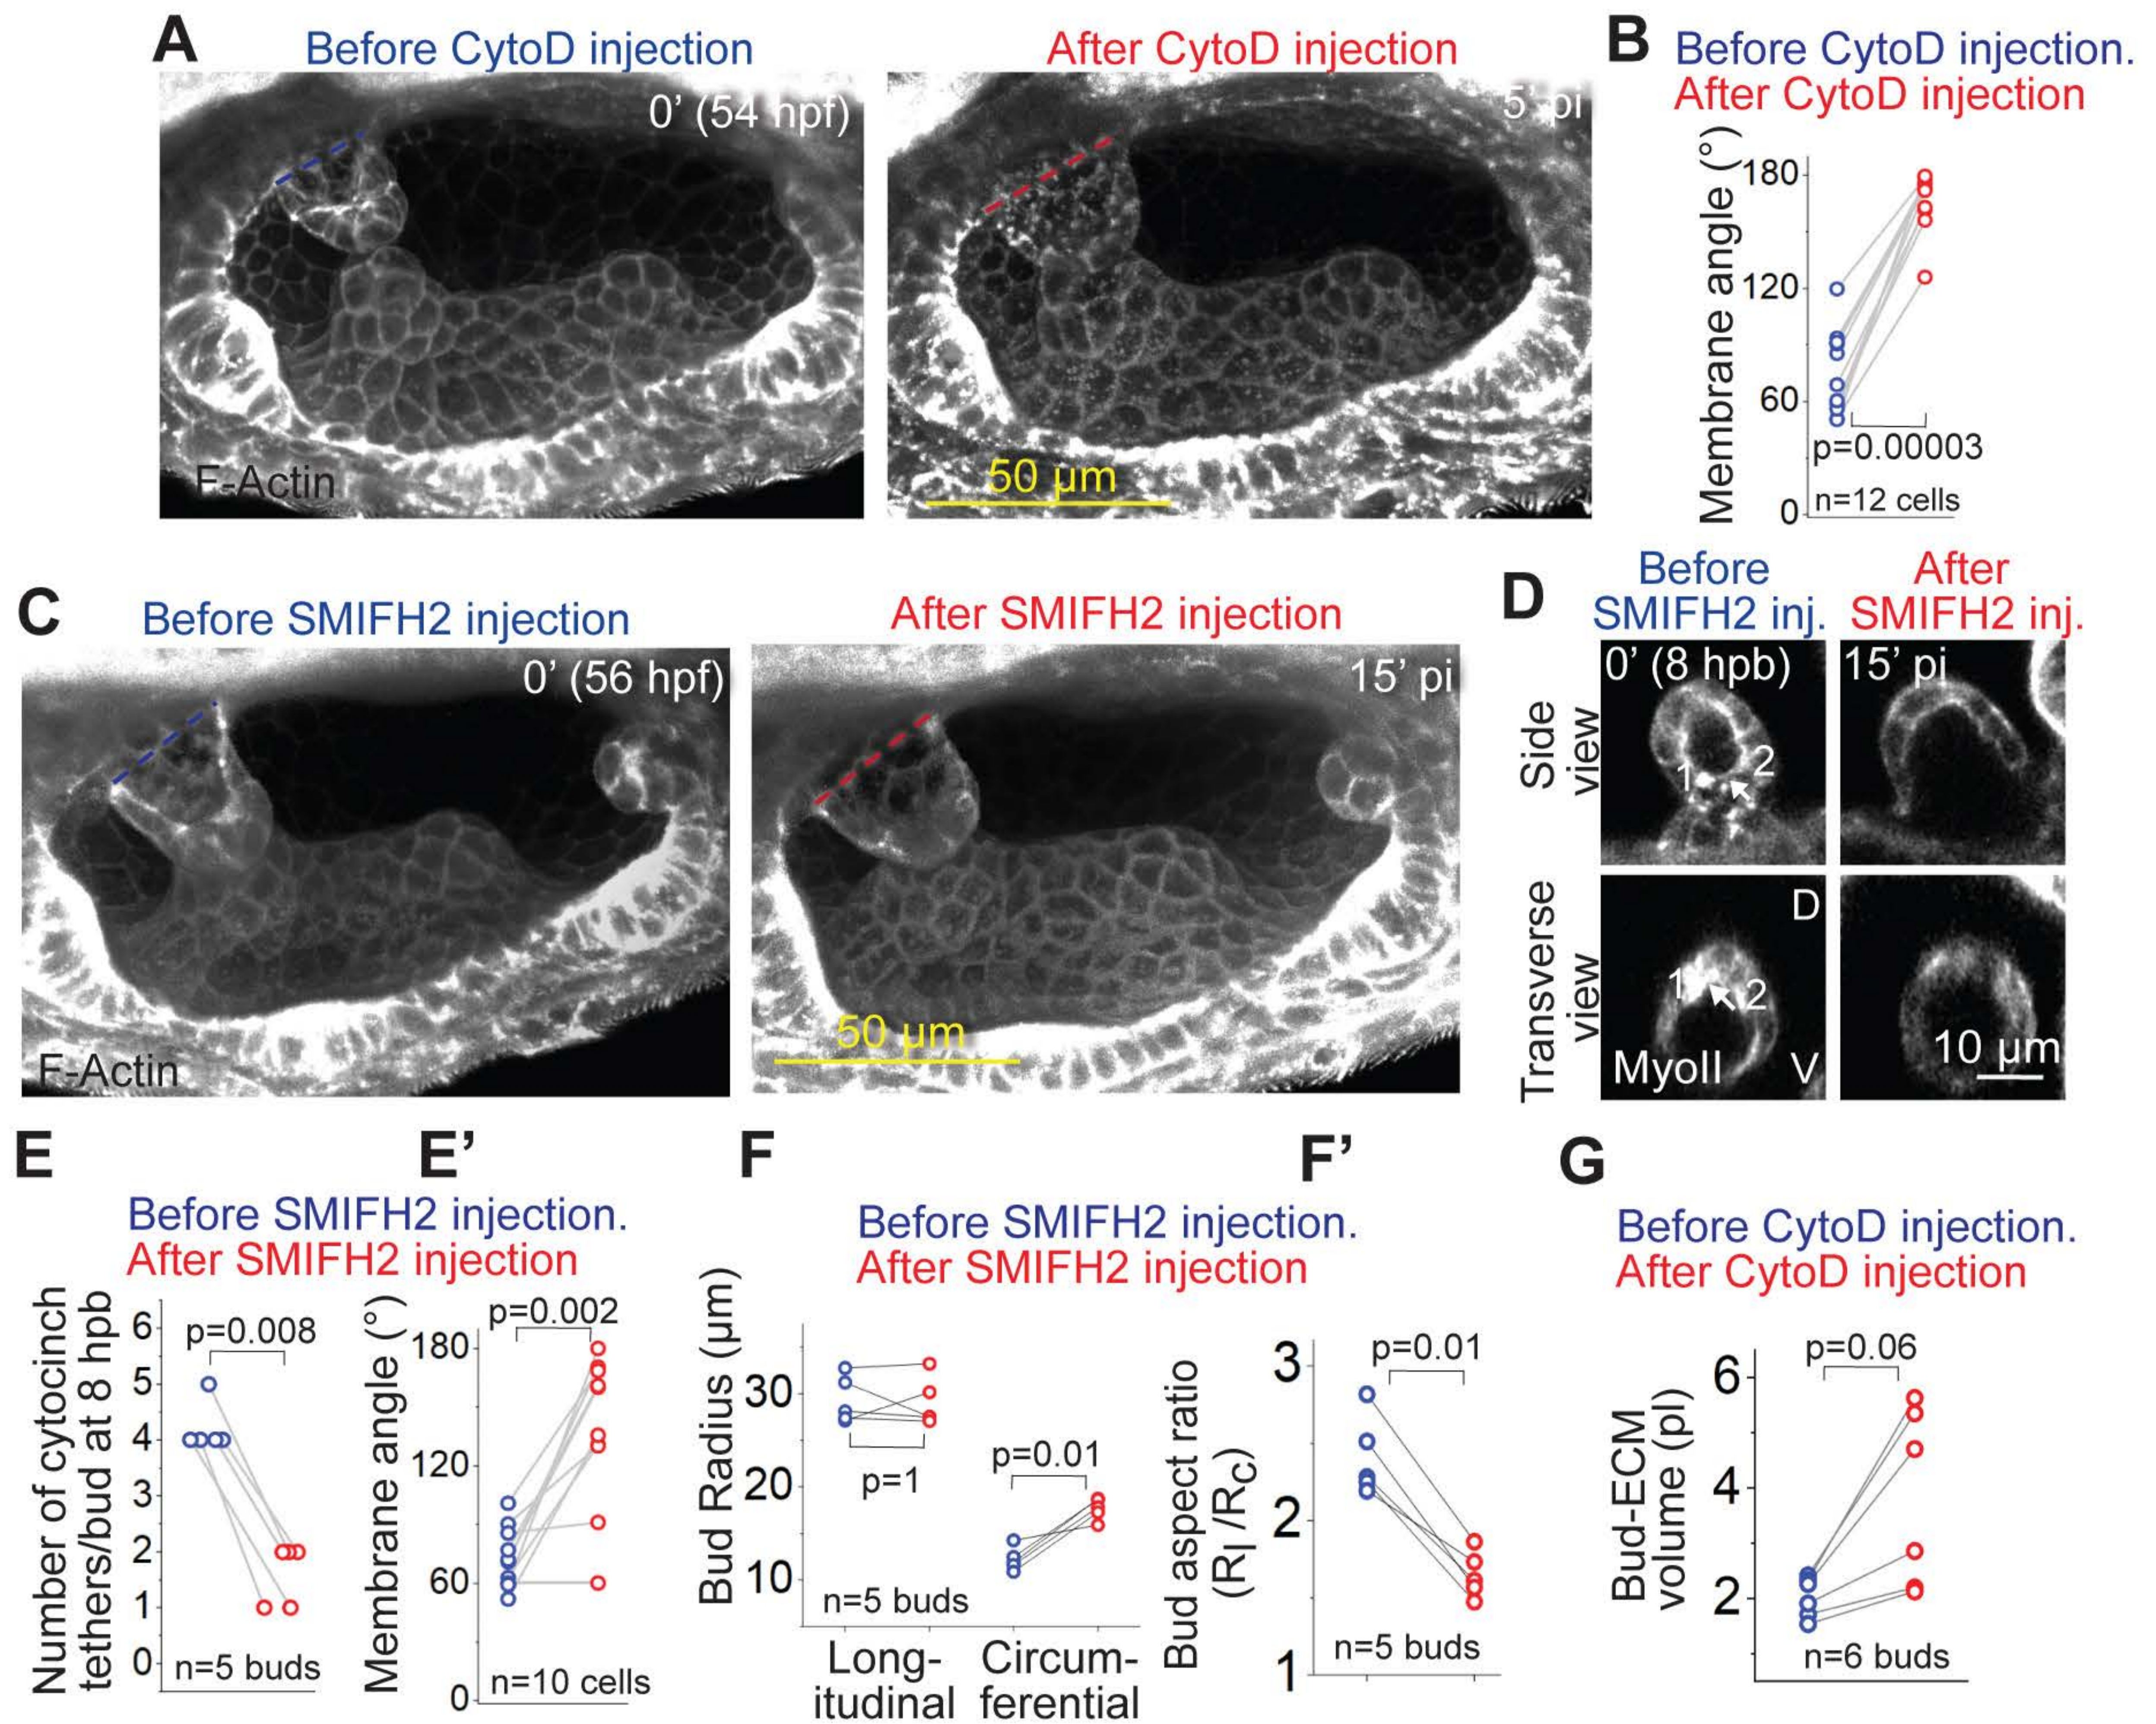

Supplement: NIHMS1759581-supplement-SF6.pdf [file NIHMS1759581-supplement-SF6.pdf]
