# Supplementary material
Source: PubMed Central journal article supplement (PMC8722442)

**Figure S7 (Related to Figure 7)- Model and experiments show that isotropic hyaluronate pressure shaped by anisotropic stiffness from cytoconches drives semicircular canal morphogenesis**

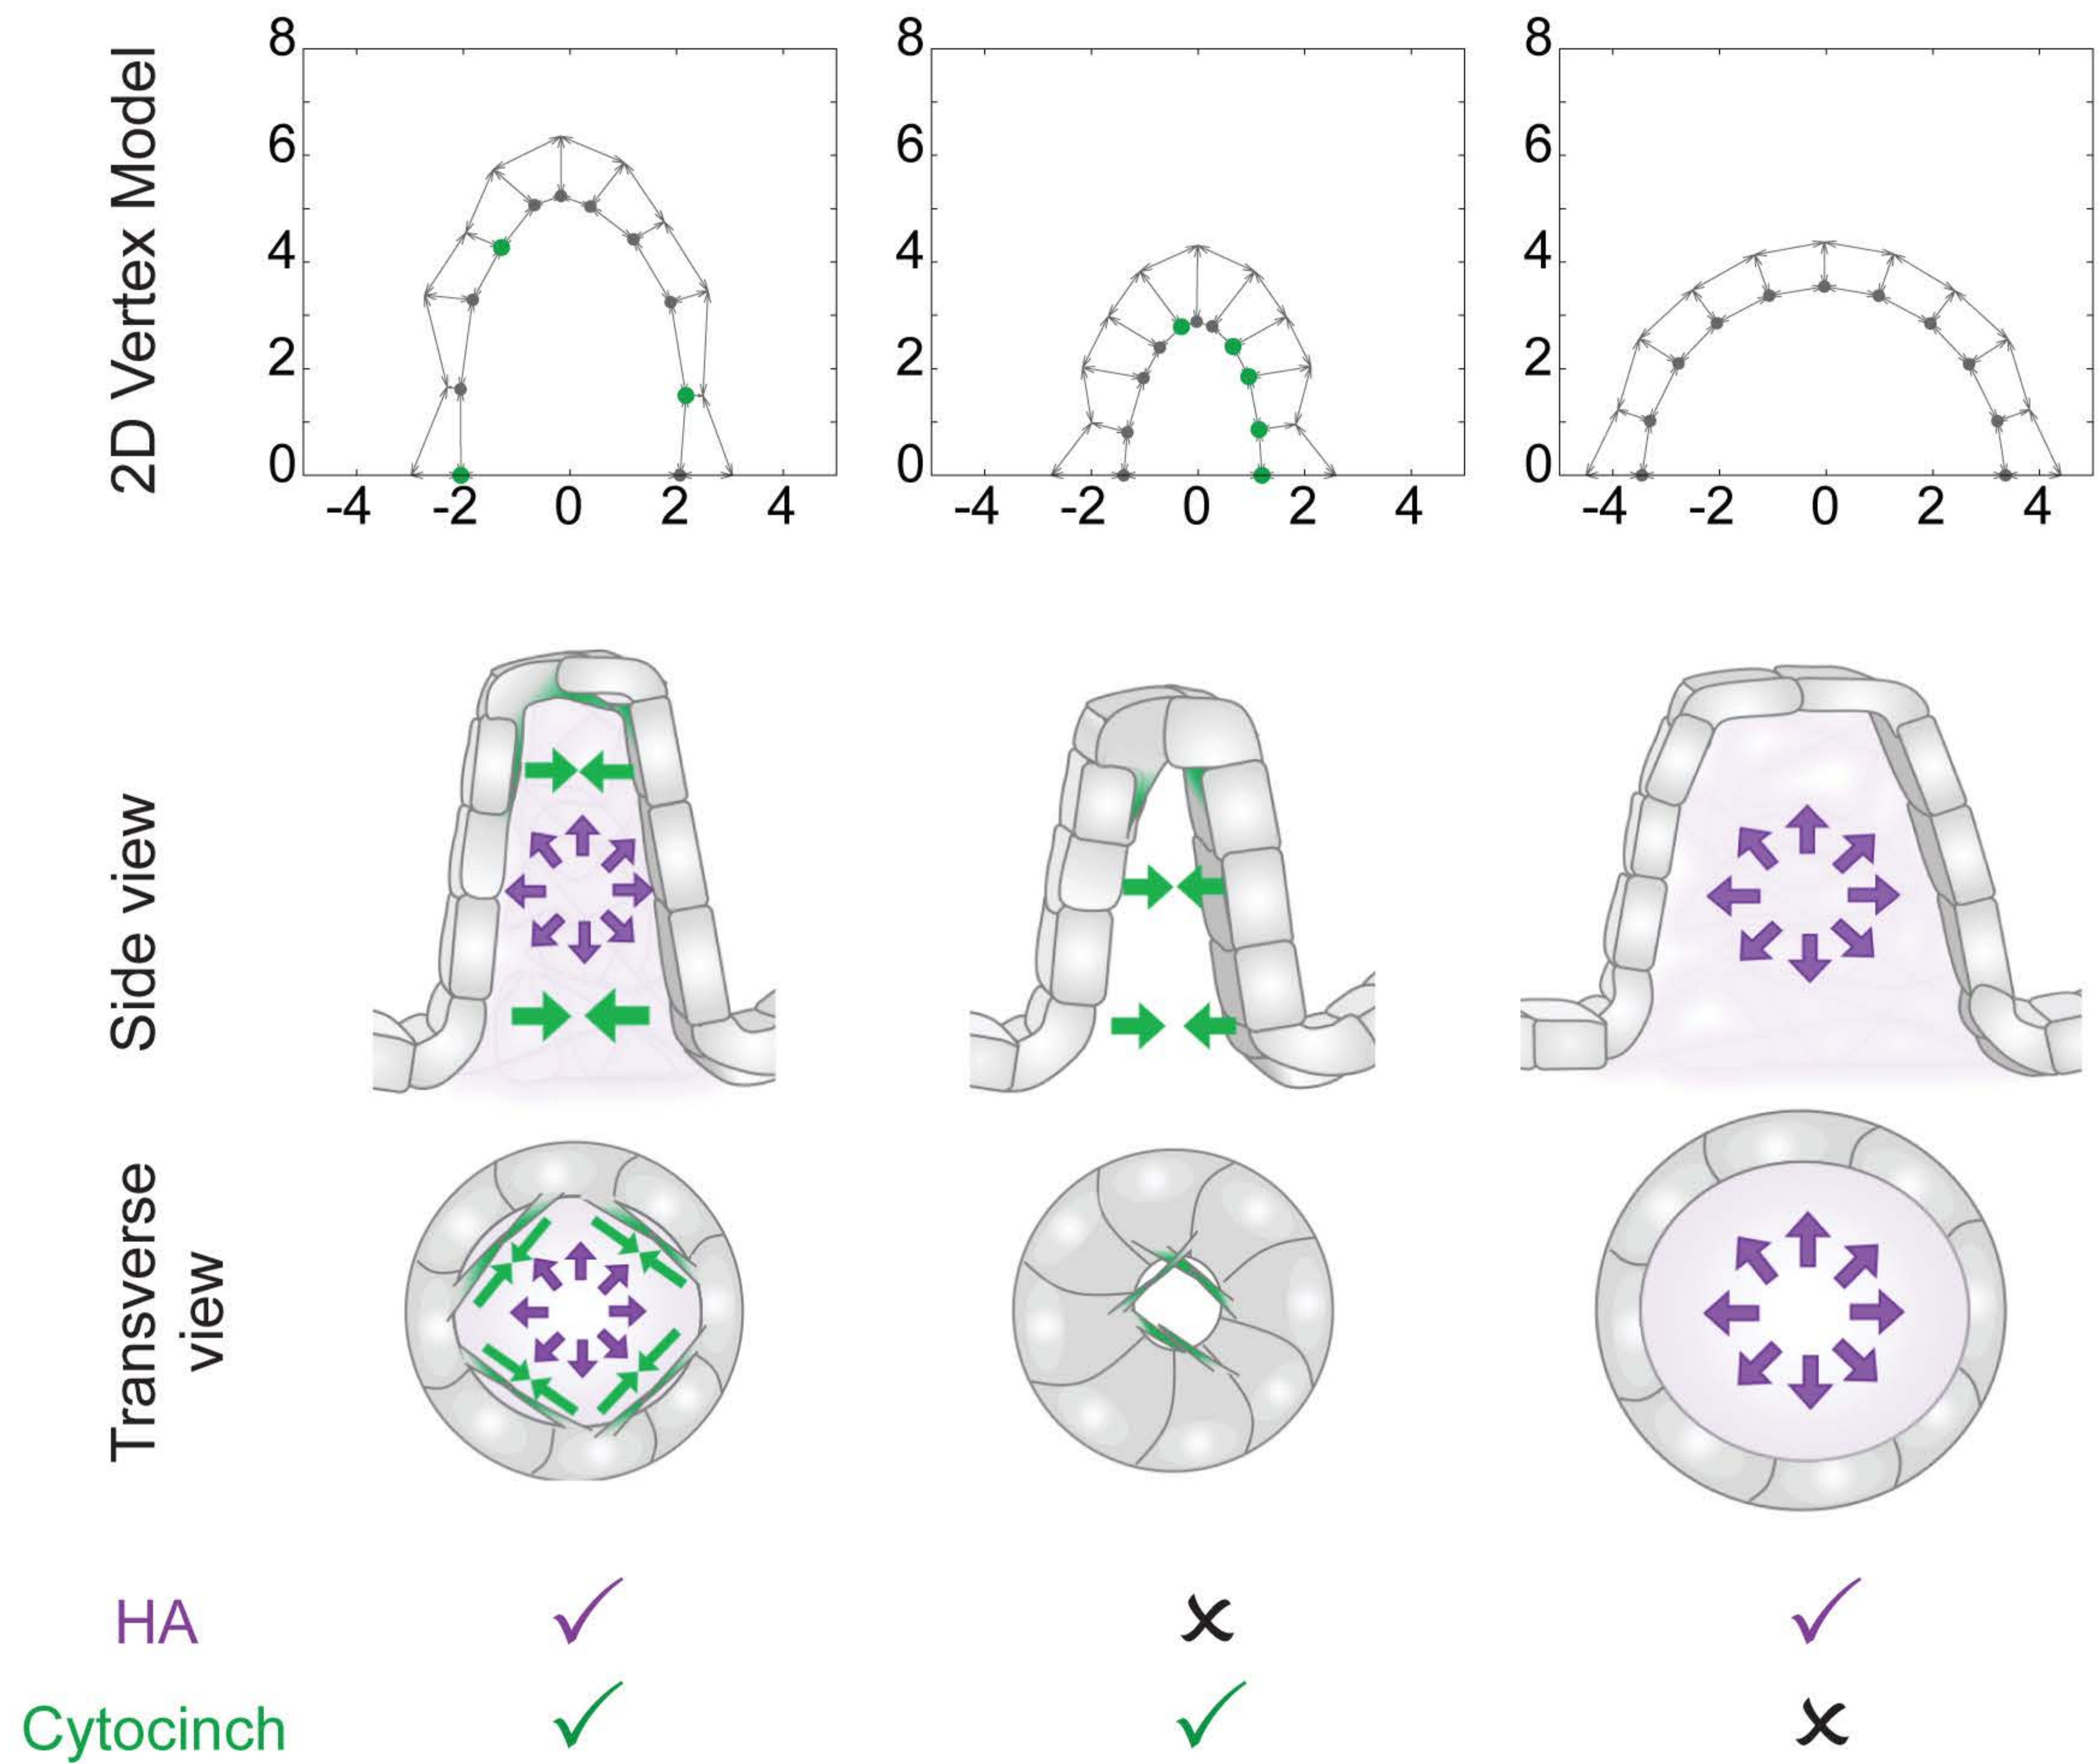

Supplement: NIHMS1759581-supplement-SF_.pdf [file NIHMS1759581-supplement-SF_.pdf]
