# Supplementary material
Source: PubMed Central journal article supplement (PMC8722442)

Figure S3 (Related to Figure 4)- HA forms a dense ECM

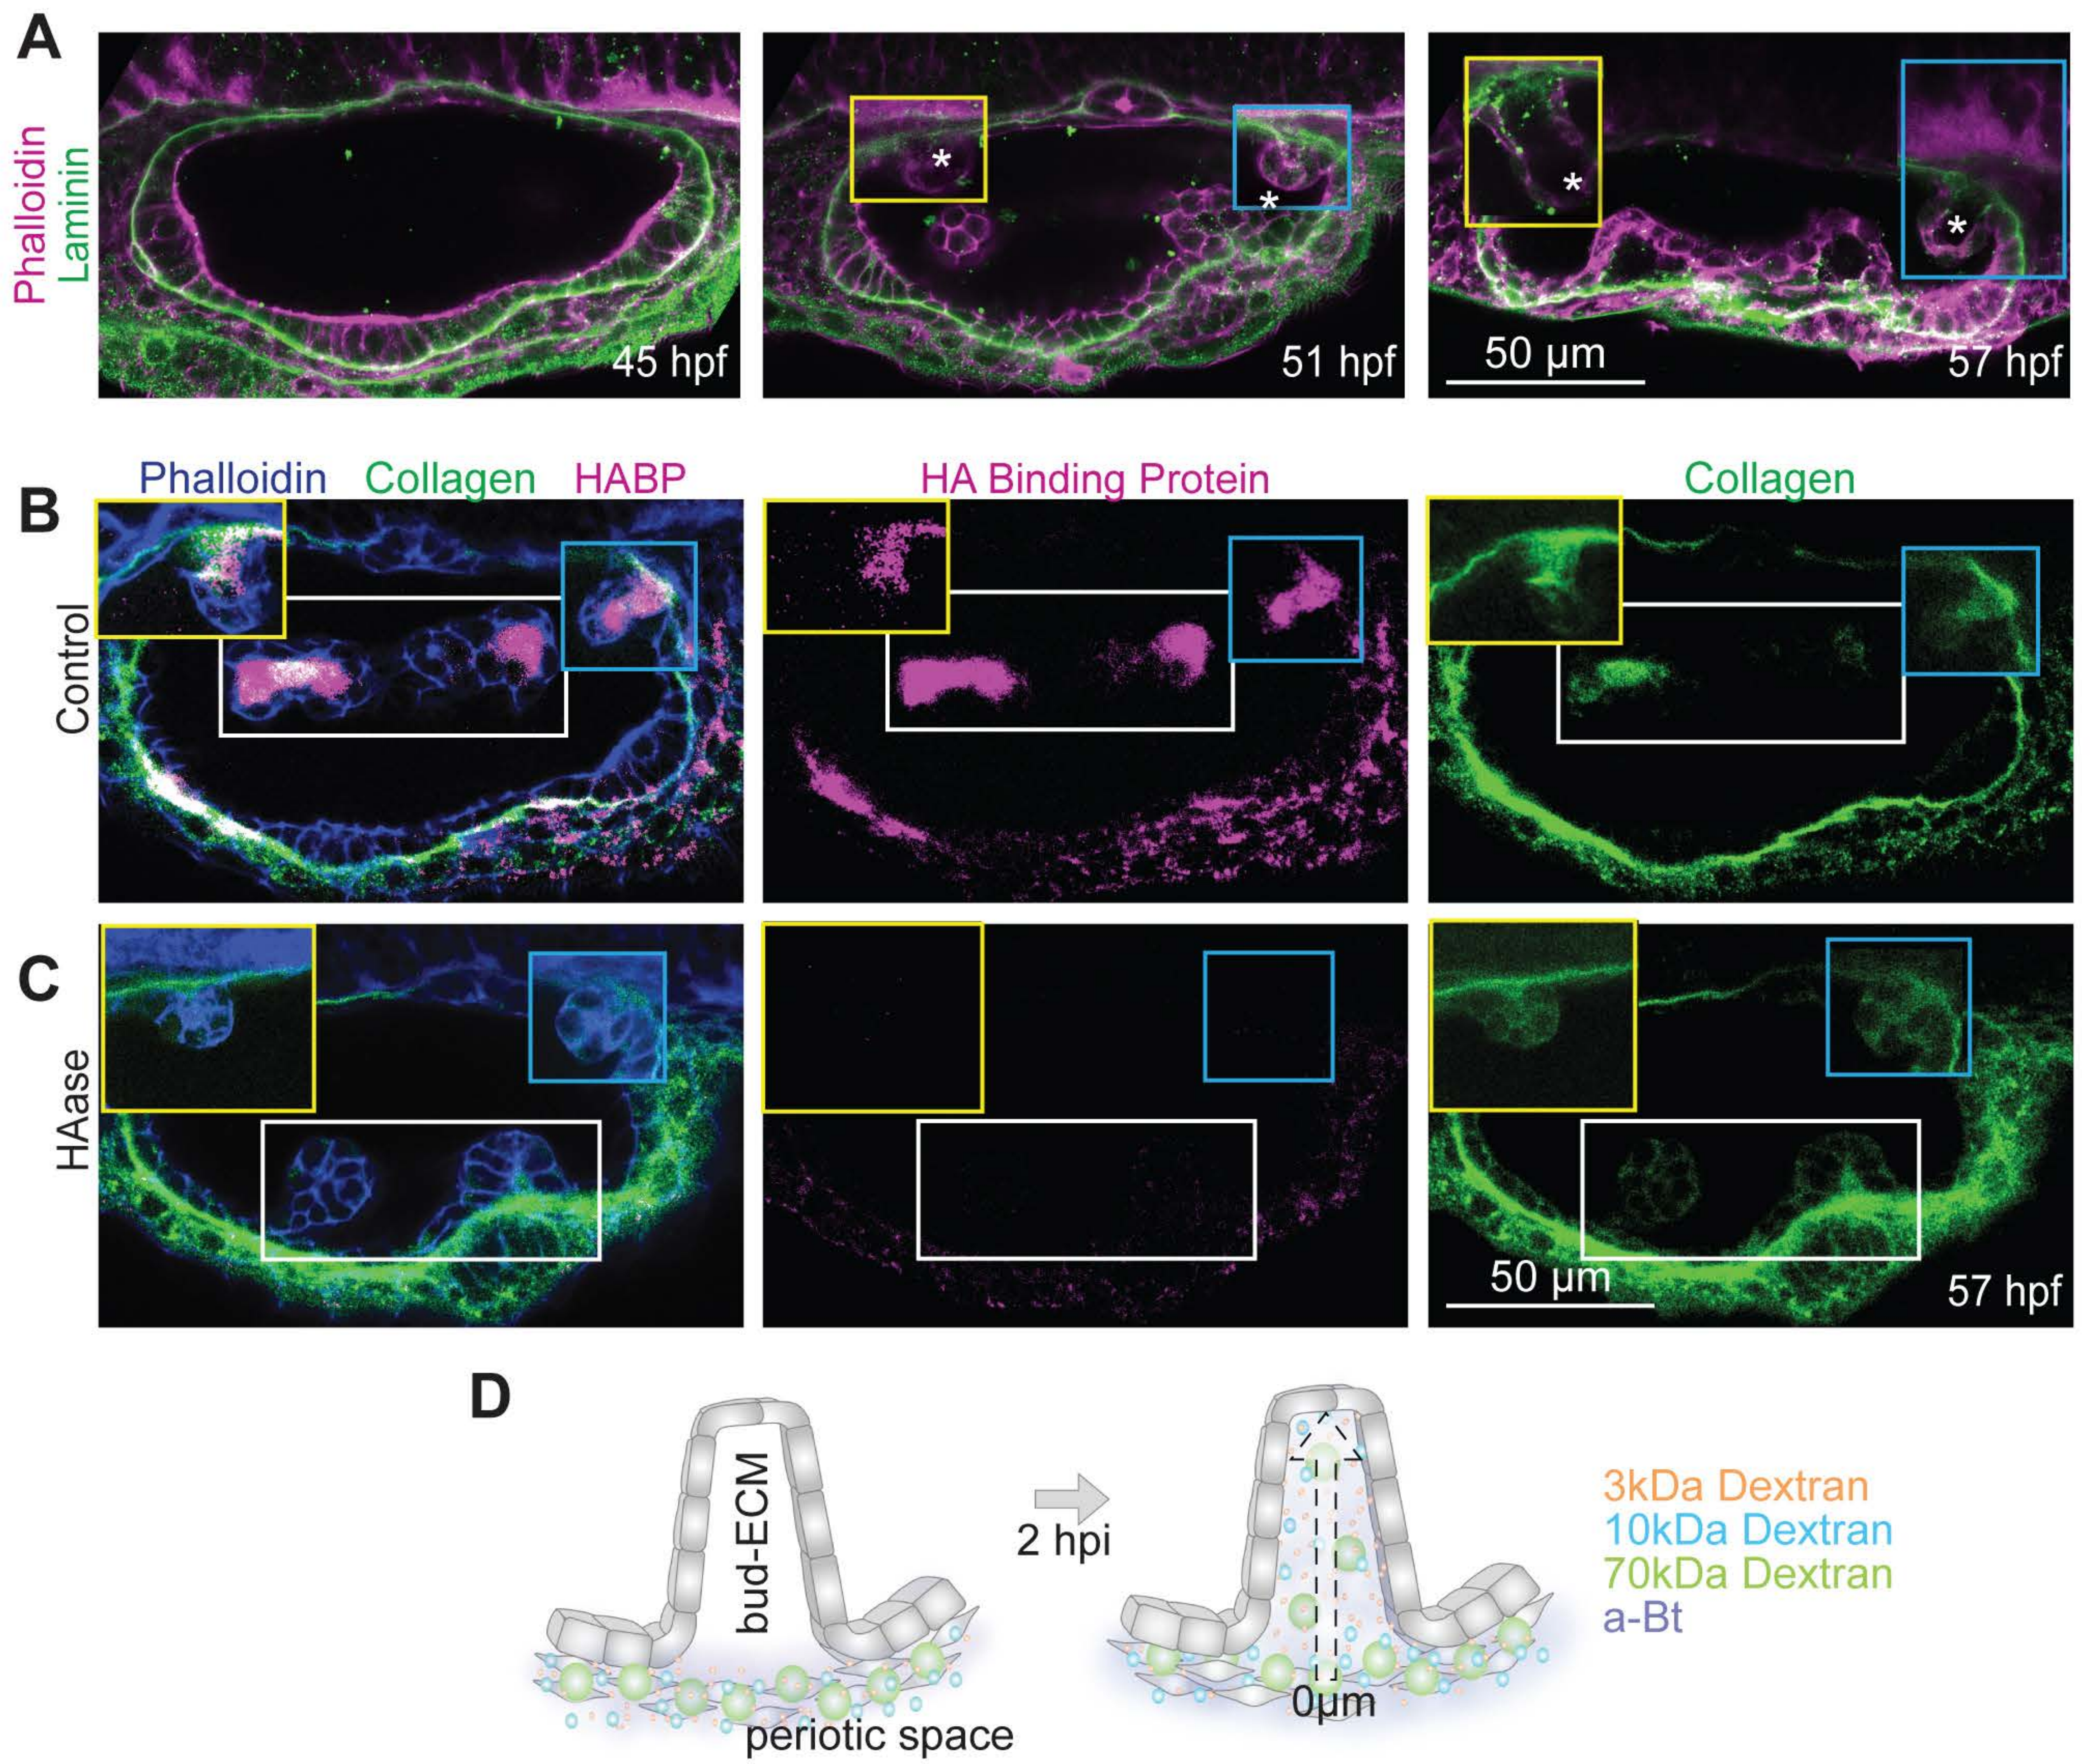

Supplement: NIHMS1759581-supplement-SF3.pdf [file NIHMS1759581-supplement-SF3.pdf]

**Figure S5 (Related to Figure 7) - A vertex model for bud-to-tube morphogenesis**

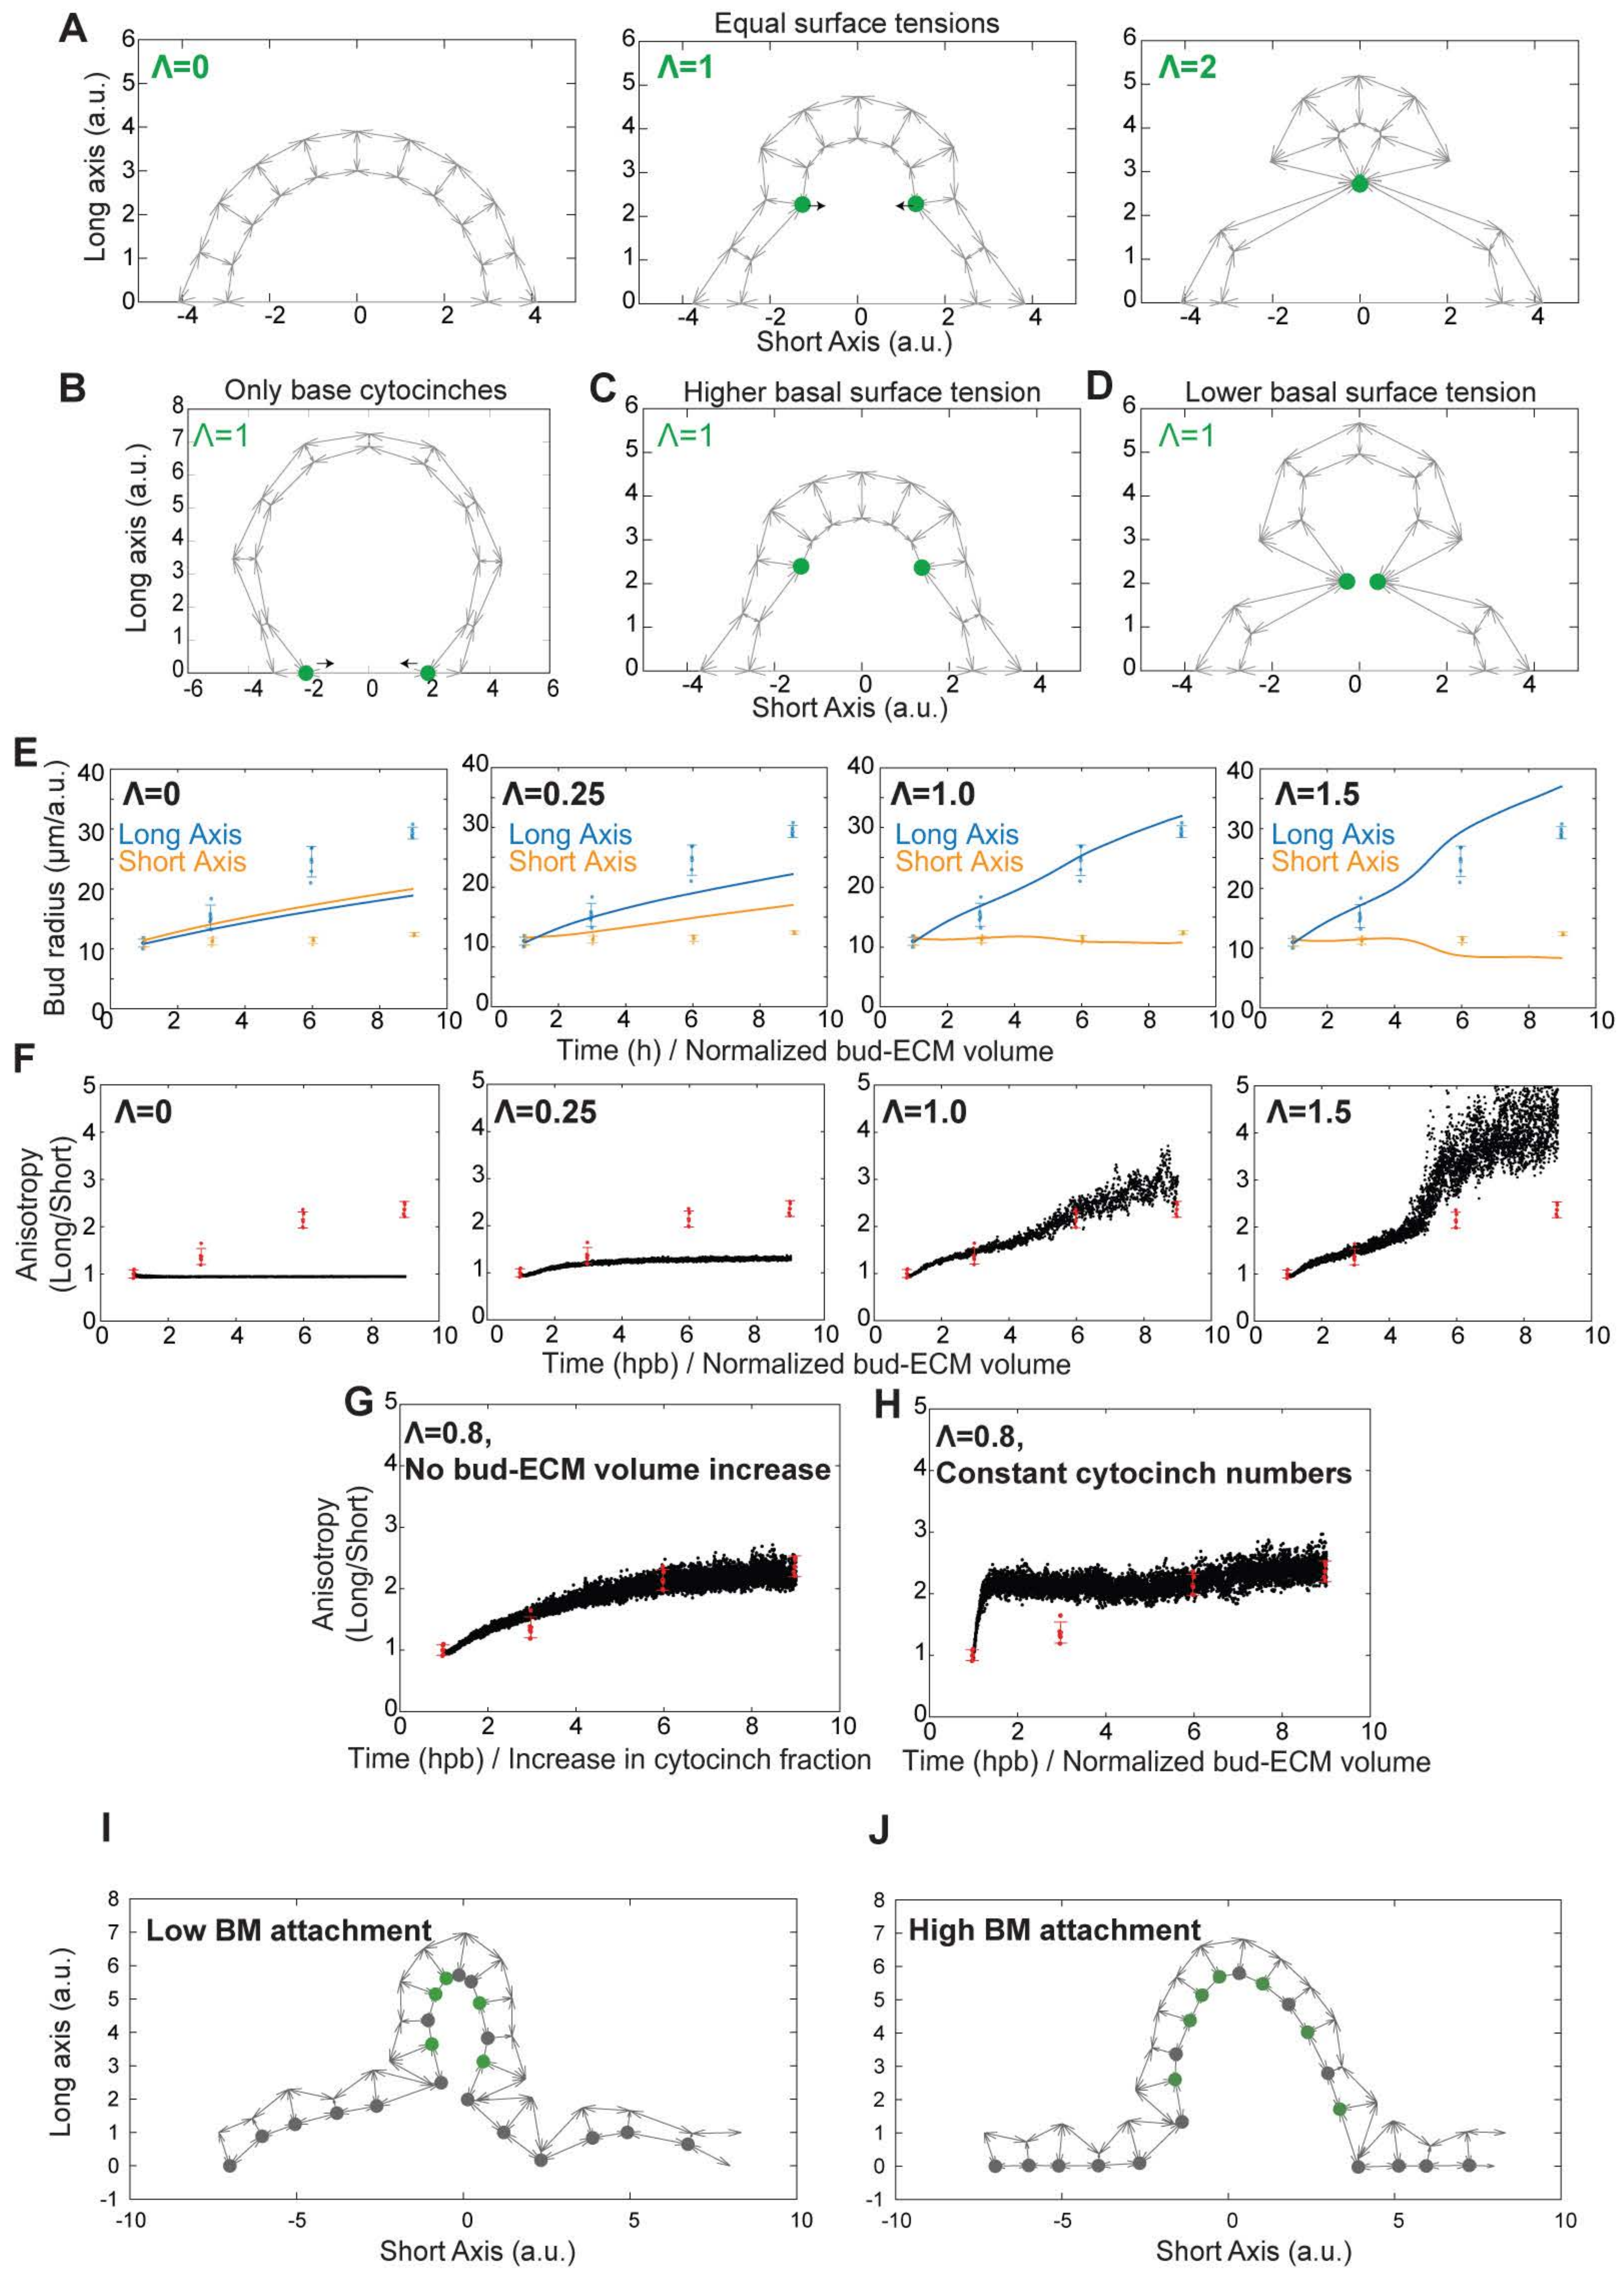

Supplement: NIHMS1759581-supplement-SF5.pdf [file NIHMS1759581-supplement-SF5.pdf]
